# Supplementary material for: Population density modulates insect progenitive plasticity through the regulation of dopamine biosynthesis
Source: Research Square preprint supplement (doi:10.21203/rs.3.rs-215638/v1), 2021-02-24
Supplement: Supplementary file 1 [file 6035756f5ea36ce9dd235b54.xlsx]

## Sheet: Sheet1
Table S2 Analysis of ecology fitness of high- and low-fecundity genotypes of the BPH under different population densities across 6 generations.	Table. S2 ANOVA of ecology fitness of high- and low-fecundity genotype of the brown planthopper, Nilaparvata lugens reared in different nymph density for 6 generations	Table. S2 ANOVA of ecology fitness of high- and low-fecundity genotype of the brown planthopper, Nilaparvata lugens reared in different nymph density for 6 generations	Table. S2 ANOVA of ecology fitness of high- and low-fecundity genotype of the brown planthopper, Nilaparvata lugens reared in different nymph density for 6 generations	Table. S2 ANOVA of ecology fitness of high- and low-fecundity genotype of the brown planthopper, Nilaparvata lugens reared in different nymph density for 6 generations	Table. S2 ANOVA of ecology fitness of high- and low-fecundity genotype of the brown planthopper, Nilaparvata lugens reared in different nymph density for 6 generations	Table. S2 ANOVA of ecology fitness of high- and low-fecundity genotype of the brown planthopper, Nilaparvata lugens reared in different nymph density for 6 generations	Table. S2 ANOVA of ecology fitness of high- and low-fecundity genotype of the brown planthopper, Nilaparvata lugens reared in different nymph density for 6 generations
	Eggs laid by per female				Population growth rate
	df	F	P		df	F	P
Genotype	1	21787.6	<0.01		1	2452.21	<0.01
Density	4	6454.93	<0.01		4	2613.63	<0.01
Generation	5	27.703	<0.01		5	2.738	0.019
Genotype×Density	4	1222.55	<0.01		4	411.38	<0.01
Genotype×Generation	5	81.677	<0.01		5	10.442	<0.01
Density×Generation	20	39.38	<0.01		20	14.139	<0.01
Genotype×Density×Generation	20	20.646	<0.01		20	3.307	<0.01
