# Supplementary material for: Population density modulates insect progenitive plasticity through the regulation of dopamine biosynthesis
Source: Research Square preprint supplement (doi:10.21203/rs.3.rs-215638/v1), 2021-02-24
Supplement: Supplementary file 2 [file c3ac241e3edb4f3450742362.xlsx]

## Sheet: Sheet1
Table S6 The module information of candidate genes
Transcript_ID	Gene_ID	Module
XM_022351615.1	LOC111063935	black
XM_022343802.1	LOC111056438	royalblue
XM_022336661.1	LOC111050349	turquoise
XM_022328291.1	LOC111043365	turquoise
XM_022335101.1	LOC111049096	turquoise
XM_022347335.1	LOC111059695	lightcyan
XM_022339780.1	LOC111052953	darkred
XM_022341376.1	LOC111054359	turquoise
XM_022335884.1	LOC111049724	turquoise
XM_022351463.1	LOC111063785	red
XM_022333787.1	LOC111047950	darkred
XM_022339661.1	LOC111052857	royalblue
XM_022338765.1	LOC111052134	pink
XM_022347711.1	LOC111060061	turquoise
XM_022342478.1	LOC111055304	turquoise
XM_022332098.1	LOC111046531	turquoise
XM_022338421.1	LOC111051821	turquoise
XM_022338053.1	LOC111051524	turquoise
XM_022336088.1	LOC111049906	royalblue
XM_022352095.1	LOC111064379	lightcyan
XM_022346028.1	LOC111058492	turquoise
XM_022337638.1	LOC111051192	darkred
XM_022339099.1	LOC111052440	turquoise
XM_022330004.1	LOC111044782	magenta
XM_022331936.1	LOC111046396	turquoise
XM_022349755.1	LOC111062057	red
XM_022346171.1	LOC111058623	turquoise
XM_022338250.1	LOC111051704	turquoise
XM_022335431.1	LOC111049383	darkred
XM_022346206.1	LOC111058654	turquoise
XM_022346653.1	LOC111059049	turquoise
